# Supplementary material for: Increased Expression of CC16 in Patients with Idiopathic Pulmonary Fibrosis
Source: PubMed Central journal article supplement (PMC5158056; doi:10.1371/journal.pone.0168552), 2016-12-15
Supplement: pone.0168552.s001.pdf [file pone.0168552.s001.pdf]

| GROUP | Gender | Age | CC16 | Smoker Status |
|-------|--------|-----|------|---------------|
| HP    | Female | 31  | 31.8 | unknown       |
| HP    | Female | 56  | 31.5 | never         |
| HP    | Female | 63  | 19.1 | never         |
| HP    | Female | 35  | 16.8 | never         |
| HP    | Female | 57  | 15.3 | never         |
| HP    | Female | 54  | 8.6  | never         |
| HP    | Female | 59  | 47.2 | never         |
| HP    | Female | 36  | 13.8 | never         |
| HP    | Female | 26  | 17.5 | never         |
| HP    | Female | 51  | 23.0 | former        |
| HP    | Female | 40  | 22.6 | never         |
| HP    | Female | 58  | 19.1 | never         |
| HP    | Female | 59  | 25.2 | never         |
| HP    | Female | 43  | 8.7  | never         |
| HP    | Female | 63  | 16.5 | never         |
| HP    | Female | 65  | 23.4 | never         |
| HP    | Female | 59  | 36.2 | never         |
| HP    | Female | 47  | 30.9 | never         |
| HP    | Female | 54  | 24.8 | never         |
| HP    | Female | 62  | 39.5 | never         |
| HP    | Female | 28  | 27.5 | never         |
| HP    | Female | 50  | 36.9 | unknown       |
| HP    | Female | 57  | 43.8 | former        |
| HP    | Female | 54  | 32.9 | never         |
| HP    | Female | 50  | 20.6 | never         |
| HP    | Female | 34  | 32.5 | former        |
| HP    | Male   | 51  | 7.0  | former        |
| HP    | Female | 50  | 32.5 | never         |
| HP    | Female | 72  | 36.4 | never         |
| HP    | Female | 64  | 12.5 | never         |
| HP    | Female | 41  | 7.8  | never         |
| HP    | Female | 55  | 21.2 | never         |
| HP    | Female | 49  | 13.4 | former        |
| HP    | Female | 55  | 28.0 | never         |
| HP    | Female | 54  | 28.4 | never         |
| HP    | Female | 66  | 30.2 | never         |
| HP    | Female | 25  | 7.8  | never         |
| HP    | Female | 60  | 17.6 | never         |
| HP    | Female | 28  | 9.7  | never         |
| HP    | Male   | 51  | 9.1  | former        |
| HP    | Female | 56  | 13.0 | never         |
| HP    | Male   | 30  | 9.5  | former        |

|    |        |    |      |         |
|----|--------|----|------|---------|
| HP | Female | 47 | 37.7 | never   |
| HP | Female | 36 | 14.3 | never   |
| HP | Female | 61 | 40.3 | never   |
| HP | Female | 53 | 41.7 | never   |
| HP | Female | 59 | 43.2 | never   |
| HP | Female | 49 | 18.8 | former  |
| HP | Female | 57 | 17.5 | never   |
| HP | Female | 55 | 40.7 | never   |
| HP | Male   | 60 | 29.7 | former  |
| HP | Female | 27 | 11.5 | unknown |
| HP | Female | 56 | 98.6 | former  |
| HP | Female | 54 | 24.8 | never   |
| HP | Female | 62 | 39.5 | former  |
| HP | Female | 28 | 27.5 | never   |
| HP | Female | 56 | 36.9 | former  |
| HP | Female | 57 | 43.8 | never   |
| HP | Female | 54 | 32.9 | former  |
| HP | Female | 50 | 20.6 | never   |
| HP | Female | 34 | 32.5 | never   |
| HP | Female | 51 | 7.0  | never   |
| HP | Female | 59 | 32.5 | never   |
| HP | Female | 72 | 36.4 | never   |
| HP | Female | 64 | 12.5 | former  |
| HP | Female | 41 | 7.8  | unknown |
| HP | Female | 55 | 21.2 | never   |
| HP | Female | 49 | 13.4 | never   |
| HP | Female | 55 | 28.0 | never   |
| HP | Female | 54 | 28.4 | former  |
| HP | Female | 66 | 30.2 | never   |
| HP | Female | 25 | 7.8  | former  |
| HP | Female | 60 | 17.6 | never   |
| HP | Female | 28 | 9.7  | never   |
| HP | Female | 51 | 9.1  | never   |
| HP | Female | 56 | 13.0 | never   |
| HP | Female | 34 | 9.5  | never   |
| HP | Female | 47 | 37.7 | former  |
| HP | Female | 36 | 14.3 | never   |
| HP | Female | 61 | 40.3 | never   |
| HP | Female | 53 | 41.7 | never   |
| HP | Female | 59 | 43.2 | never   |
| HP | Female | 52 | 18.8 | never   |
| HP | Female | 57 | 17.5 | former  |
| HP | Female | 60 | 15.3 | never   |

|      |             |      |
|------|-------------|------|
| Prom | 50.56470588 | 24.9 |
| DE   | 11.72649326 | 14.1 |

|         |        |    |      |         |
|---------|--------|----|------|---------|
| CTD-ILD | Female | 47 | 36.4 | never   |
| CTD-ILD | Female | 45 | 11.5 | never   |
| CTD-ILD | Female | 75 | 17.7 | never   |
| CTD-ILD | Female | 54 | 14.7 | unknown |
| CTD-ILD | Female | 55 | 16.0 | never   |
| CTD-ILD | Female | 73 | 28.3 | never   |
| CTD-ILD | Male   | 69 | 44.6 | former  |
| CTD-ILD | Female | 49 | 8.2  | former  |
| CTD-ILD | Female | 63 | 17.8 | never   |
| CTD-ILD | Female | 53 | 20.7 | never   |
| CTD-ILD | Male   | 37 | 15.4 | never   |
| CTD-ILD | Female | 61 | 20.5 | never   |
| CTD-ILD | Male   | 55 | 14.0 | former  |
| CTD-ILD | Female | 49 | 25.0 | unknown |
| CTD-ILD | Female | 65 | 10.5 | former  |
| CTD-ILD | Female | 68 | 12.8 | never   |
| CTD-ILD | Female | 37 | 11.4 | never   |
| CTD-ILD | Female | 30 | 12.1 | former  |
| CTD-ILD | Female | 31 | 8.0  | former  |
| CTD-ILD | Male   | 46 | 54.9 | never   |
| CTD-ILD | Female | 68 | 16.9 | never   |
| CTD-ILD | Female | 61 | 19.2 | former  |
| CTD-ILD | Male   | 57 | 48.2 | never   |
| CTD-ILD | Female | 50 | 19.0 | unknown |
| CTD-ILD | Female | 54 | 27.1 | former  |
| CTD-ILD | Female | 52 | 3.9  | former  |
| CTD-ILD | Female | 48 | 25.0 | former  |
| CTD-ILD | Female | 59 | 14.8 | never   |
| CTD-ILD | Female | 76 | 30.9 | never   |
| CTD-ILD | Female | 63 | 36.9 | never   |
| CTD-ILD | Female | 61 | 34.2 | former  |
| CTD-ILD | Female | 54 | 13.8 | former  |
| CTD-ILD | Female | 62 | 33.3 | former  |
| CTD-ILD | Male   | 64 | 13.0 | unknown |
| CTD-ILD | Female | 48 | 24.1 | never   |
| CTD-ILD | Female | 68 | 17.6 | never   |
| CTD-ILD | Female | 53 | 25.4 | never   |
| CTD-ILD | Female | 68 | 19.8 | former  |
| CTD-ILD | Female | 56 | 22.7 | former  |
| CTD-ILD | Male   | 44 | 13.6 | never   |

|         |        |    |      |         |
|---------|--------|----|------|---------|
| CTD-ILD | Male   | 64 | 25.6 | never   |
| CTD-ILD | Male   | 60 | 6.6  | never   |
| CTD-ILD | Female | 58 | 7.8  | never   |
| CTD-ILD | Female | 56 | 10.5 | never   |
| CTD-ILD | Female | 50 | 4.0  | unknown |
| CTD-ILD | Female | 64 | 19.3 | former  |
| CTD-ILD | Male   | 54 | 48.5 | former  |
| CTD-ILD | Male   | 64 | 24.3 | former  |
| CTD-ILD | Male   | 56 | 18.3 | former  |
| CTD-ILD | Female | 58 | 33.5 | former  |
| CTD-ILD | Female | 54 | 14.7 | never   |
| CTD-ILD | Female | 55 | 16.0 | never   |
| CTD-ILD | Female | 73 | 28.3 | never   |
| CTD-ILD | Male   | 69 | 44.6 | former  |
| CTD-ILD | Female | 49 | 8.2  | never   |
| CTD-ILD | Female | 63 | 17.8 | former  |
| CTD-ILD | Female | 53 | 20.7 | former  |
| CTD-ILD | Male   | 39 | 15.4 | former  |
| CTD-ILD | Female | 61 | 20.5 | never   |
| CTD-ILD | Male   | 55 | 14.0 | former  |
| CTD-ILD | Female | 45 | 25.0 | never   |
| CTD-ILD | Female | 60 | 10.5 | never   |
| CTD-ILD | Female | 68 | 12.8 | never   |
| CTD-ILD | Female | 39 | 11.4 | never   |
| CTD-ILD | Female | 35 | 12.1 | unknown |
| CTD-ILD | Female | 33 | 8.0  | never   |
| CTD-ILD | Male   | 49 | 54.9 | former  |
| CTD-ILD | Female | 68 | 16.9 | former  |
| CTD-ILD | Male   | 60 | 19.2 | never   |
| CTD-ILD | Male   | 57 | 48.2 | never   |
| CTD-ILD | Female | 55 | 19.0 | never   |
| CTD-ILD | Female | 54 | 27.1 | never   |
| CTD-ILD | Male   | 59 | 3.9  | former  |
| CTD-ILD | Female | 50 | 25.0 | unknown |
| CTD-ILD | Female | 59 | 14.8 | never   |
| CTD-ILD | Female | 76 | 30.9 | former  |
| CTD-ILD | Female | 63 | 36.9 | never   |
| CTD-ILD | Female | 61 | 34.2 | never   |
| CTD-ILD | Female | 60 | 13.8 | former  |
| CTD-ILD | Female | 62 | 33.3 | former  |
| CTD-ILD | Male   | 64 | 13.0 | former  |
| CTD-ILD | Female | 58 | 24.1 | never   |
| CTD-ILD | Female | 68 | 17.6 | never   |

|         |        |             |      |        |
|---------|--------|-------------|------|--------|
| CTD-ILD | Female | 58          | 25.4 | never  |
| CTD-ILD | Male   | 68          | 19.8 | former |
|         | Prom   | 56.61176471 | 21.4 |        |
|         | DE     | 10.20165033 | 11.6 |        |

|     |        |    |      |         |
|-----|--------|----|------|---------|
| IPF | Male   | 59 | 49.0 | never   |
| IPF | Male   | 73 | 44.7 | never   |
| IPF | Male   | 68 | 45.5 | former  |
| IPF | Male   | 60 | 27.1 | former  |
| IPF | Male   | 57 | 8.1  | former  |
| IPF | Male   | 60 | 36.1 | former  |
| IPF | Male   | 65 | 41.5 | former  |
| IPF | Female | 60 | 18.2 | former  |
| IPF | Female | 50 | 35.5 | never   |
| IPF | Male   | 58 | 28.4 | unknown |
| IPF | Male   | 74 | 40.5 | former  |
| IPF | Male   | 70 | 20.1 | never   |
| IPF | Male   | 54 | 24.4 | former  |
| IPF | Female | 64 | 29.1 | former  |
| IPF | Male   | 57 | 20.4 | former  |
| IPF | Female | 70 | 35.7 | never   |
| IPF | Male   | 61 | 39.4 | former  |
| IPF | Male   | 79 | 24.4 | former  |
| IPF | Male   | 63 | 24.9 | former  |
| IPF | Male   | 70 | 31.5 | never   |
| IPF | Female | 68 | 18.5 | never   |
| IPF | Male   | 79 | 38.9 | never   |
| IPF | Male   | 64 | 22.7 | former  |
| IPF | Male   | 70 | 26.2 | former  |
| IPF | Male   | 72 | 30.6 | former  |
| IPF | Male   | 62 | 30.1 | former  |
| IPF | Male   | 76 | 43.4 | former  |
| IPF | Female | 66 | 55.7 | never   |
| IPF | Male   | 65 | 35.2 | former  |
| IPF | Male   | 66 | 21.1 | former  |
| IPF | Male   | 75 | 40.4 | former  |
| IPF | Male   | 57 | 17.5 | never   |
| IPF | Male   | 69 | 29.7 | unknown |
| IPF | Male   | 76 | 28.3 | former  |
| IPF | Male   | 49 | 16.3 | former  |
| IPF | Female | 60 | 25.2 | never   |
| IPF | Male   | 70 | 34.5 | never   |
| IPF | Male   | 58 | 30.3 | former  |

|     |        |    |      |         |
|-----|--------|----|------|---------|
| IPF | Male   | 68 | 29.2 | former  |
| IPF | Male   | 70 | 26.2 | unknown |
| IPF | Male   | 72 | 31.1 | former  |
| IPF | Male   | 67 | 21.2 | never   |
| IPF | Male   | 57 | 17.7 | former  |
| IPF | Female | 70 | 15.7 | former  |
| IPF | Male   | 60 | 39.8 | former  |
| IPF | Female | 72 | 48.8 | former  |
| IPF | Male   | 76 | 28.1 | former  |
| IPF | Male   | 67 | 48.3 | former  |
| IPF | Female | 67 | 22.0 | never   |
| IPF | Male   | 64 | 27.6 | former  |
| IPF | Male   | 73 | 42.4 | never   |
| IPF | Male   | 76 | 36.9 | never   |
| IPF | Male   | 68 | 23.9 | former  |
| IPF | Male   | 65 | 60.0 | former  |
| IPF | Male   | 70 | 17.8 | unknown |
| IPF | Male   | 69 | 61.1 | never   |
| IPF | Male   | 69 | 30.6 | former  |
| IPF | Male   | 79 | 43.3 | former  |
| IPF | Male   | 64 | 31.7 | former  |
| IPF | Male   | 84 | 44.1 | former  |
| IPF | Male   | 54 | 45.2 | former  |
| IPF | Male   | 70 | 36.4 | never   |
| IPF | Male   | 57 | 24.1 | former  |
| IPF | Male   | 76 | 30.2 | former  |
| IPF | Male   | 66 | 41.2 | unknown |
| IPF | Male   | 59 | 24.4 | former  |
| IPF | Male   | 57 | 8.1  | never   |
| IPF | Male   | 60 | 36.1 | never   |
| IPF | Male   | 65 | 41.5 | never   |
| IPF | Female | 60 | 18.2 | never   |
| IPF | Female | 50 | 35.5 | never   |
| IPF | Male   | 58 | 28.4 | never   |
| IPF | Male   | 74 | 40.5 | never   |
| IPF | Male   | 70 | 20.1 | never   |
| IPF | Male   | 54 | 24.4 | never   |
| IPF | Female | 64 | 29.1 | never   |
| IPF | Male   | 57 | 20.4 | unknown |
| IPF | Male   | 70 | 35.7 | unknown |
| IPF | Male   | 61 | 39.4 | never   |
| IPF | Male   | 79 | 24.4 | unknown |
| IPF | Male   | 63 | 24.9 | unknown |

|     |        |             |      |        |
|-----|--------|-------------|------|--------|
| IPF | Female | 70          | 31.5 | former |
| IPF | Male   | 68          | 18.5 | former |
| IPF | Male   | 79          | 38.9 | former |
| IPF | Male   | 64          | 22.7 | never  |
|     | Prom   | 65.95294118 | 31.2 |        |
|     | DE     | 7.543375969 | 10.8 |        |

|         |        |    |      |         |
|---------|--------|----|------|---------|
| Control | Male   | 63 | 5.4  | unknown |
| Control | Female | 52 | 15.3 | unknown |
| Control | Female | 56 | 26.1 | unknown |
| Control | Female | 66 | 30.4 | unknown |
| Control | Female | 59 | 10.8 | unknown |
| Control | Female | 66 | 5.4  | unknown |
| Control | Male   | 74 | 6.3  | unknown |
| Control | Female | 53 | 14.0 | unknown |
| Control | Female | 87 | 8.6  | unknown |
| Control | Male   | 75 | 6.7  | unknown |
| Control | Male   | 74 | 10.8 | unknown |
| Control | Female | 73 | 4.9  | unknown |
| Control | Female | 67 | 6.0  | unknown |
| Control | Female | 73 | 4.5  | unknown |
| Control | Female | 66 | 8.7  | unknown |
| Control | Female | 69 | 6.3  | unknown |
| Control | Female | 50 | 14.0 | unknown |
| Control | Female | 50 | 8.6  | unknown |
| Control | Male   | 53 | 6.7  | unknown |
| Control | Female | 56 | 10.8 | unknown |
| Control | Male   | 72 | 4.9  | unknown |
| Control | Female | 58 | 6.0  | unknown |
| Control | Male   | 66 | 4.5  | unknown |
| Control | Female | 59 | 8.7  | unknown |
| Control | Female | 77 | 5.4  | unknown |
| Control | Female | 61 | 15.3 | unknown |
| Control | Male   | 64 | 26.1 | unknown |
| Control | Female | 50 | 30.4 | unknown |
| Control | Male   | 64 | 10.8 | unknown |
| Control | Female | 67 | 5.4  | unknown |
| Control | Female | 91 | 4.2  | unknown |

64.87096774 10.70709677  
10.34002558 7.619448433
